# Supplementary material
Source: PubMed Central journal article supplement (PMC5827406)
Supplement: JVI.01853-17_zjv006183389s1.pdf [file JVI.01853-17_zjv006183389s1.pdf]

Table S1: Multiple sequence alignment for amino acid sequences of HEV pORF1. Alignment is performed by using ClustalW program in Bioedit software. It represents the conserved cleavage site for thrombin and factor Xa on pORF1.

| Accession no. | Factor Xa site | Thrombin 1 <sup>st</sup> site | Thrombin 2 <sup>nd</sup> | Accession no. | Factor Xa site | Thrombin 1 <sup>st</sup> site | Thrombin 2 <sup>nd</sup> |
|---------------|----------------|-------------------------------|--------------------------|---------------|----------------|-------------------------------|--------------------------|
| BAA011172.1   | CVDGRLDCE      | TLTEHPIIH                     | SVIRGNPDA                | BAD95603.1    | DADGRLTCK      | TLTEHPIIH                     | SVIRHSTVI                |
| AAA654882.1   | CVDGRLDCE      | TLTEHPIIH                     | SVIRGNPDA                | BAE02700.1    | DAEGRRLTCK     | TLTEHPIIH                     | SVVHSTIS                 |
| CAA669336.1   | CVDGRLDCE      | TLTEHPIIH                     | SVIRGNPDT                | BAE02703.1    | DAEGRRLTCK     | TLTEHPIIH                     | SVVHSTIS                 |
| BAA018665.1   | CVDGRLDCE      | TLTEHPIIH                     | SVIRGNPDA                | BAE48647.1    | AGPIHLECF      | TLTEHPIIH                     | SVIRHGNPL                |
| CAA678009.1   | CVDGRLDCE      | TLTEHPIIH                     | SVIRGNPDA                | BAE48650.1    | AGPIHLECF      | TLTEHPIIH                     | SVIRHGNPL                |
| AAC971826.1   | ASPIRLECR      | TLTEHPIIH                     | SVIRGNPDC                | BAE48653.1    | AGPIHLECF      | TLTEHPIIH                     | SVIRHGNPL                |
| AAD15812.1    | ASPIRLECR      | TLTEHPIIH                     | SVIRGNPDC                | BAE75896.1    | AGPIHLECF      | TLTEHPIIH                     | SVIRHGNPL                |
| AAD15815.1    | CVDGRLDCE      | TLTEHPIIH                     | SVIRGNPDC                | BAE79643.1    | DADGRLTCK      | TLTEHPIIH                     | SVIRHSTVL                |
| AAB820029.2   | CVDGRLDCE      | TLTEHPIIH                     | SVIRGNPDA                | BAE79646.1    | DTDGRRLTCK     | TLTEHPIIH                     | SVIRHSTIN                |
| AAC279334.2   | DADGRLTCK      | TLTEHPIIH                     | SVIRGTIDN                | BAE79649.1    | DTDGRRLTCK     | TLTEHPIIH                     | SVIRHSTIN                |
| CAB832009.1   | CVDGRLDCE      | TLTEHPIIH                     | SVIRGNPDA                | BAE79652.1    | DADGRLTCK      | TLTEHPIIH                     | SVIRHSTIL                |
| AAG16764.1    | ASPIRLECR      | TLTEHPIIH                     | SVIRGNPDC                | BAE79655.1    | DTDGRRLTCK     | TLTEHPIIH                     | SVIRHSTIN                |
| CAC501800.1   | ASPIRLECR      | TLTEHPIIH                     | SVIRGNPDC                | BAE79658.1    | DTDGRRLTCK     | TLTEHPIIH                     | SVIRHSTIN                |
| CAC501820.1   | AGPIRLECF      | TLTEHPIIH                     | SVIRGNPDR                | BAE79661.1    | DTDGRRLTCK     | TLTEHPIIH                     | SVIRHSTIN                |
| BAB633939.2   | DADGRLTCK      | TLTEHPIIH                     | SVIRGTVDS                | BAE79664.1    | DTDGRRLTCK     | TLTEHPIIH                     | SVIRHSTIN                |
| BAB933533.2   | DTDGRRLTCK     | TLTEHPIIH                     | SVIRGTINN                | BAE79667.1    | DTDGRRLTCK     | TLTEHPIIH                     | SVIRHSTIN                |
| BAB933533.3   | ASPIRLECR      | TLTEHPIIH                     | SVIRGNPDC                | BAE86998.1    | DADGRLTCK      | TLTEHPIIH                     | SVIRHSTIL                |
| BAB933533.4   | ASPIRLECR      | TLTEHPIIH                     | SVIRGNPDC                | BAE92012.1    | AGPIHLECF      | TLTEHPIIH                     | SVIRHGNPL                |
| BAB933533.5   | CVDGRLDCE      | TLTEHPIIH                     | SVIRGNPDA                | ABE27147.1    | DADGRLTCK      | TLTEHPIIH                     | SVIRHSTIL                |
| BAB933533.6   | DADGRLTCK      | TLTEHPIIH                     | SVIRGNPDA                | ABE73522.1    | CADGRLDCE      | TLTEHPIIH                     | SVIRHGNPL                |
| AAM663329.1   | ASPIRLECR      | TLTEHPIIH                     | SVIRGTVDS                | BAE98084.1    | ASPGHLECF      | TLTEHPIIH                     | STIRHGNPL                |
| BAC056699.1   | AGPIRLECF      | TLTEHPIIH                     | SVIRGNPDC                | BAE98087.1    | ASPGHLECF      | TLTEHPIIH                     | STIRHGNPL                |
| BAC448399.7   | DADGRLTCK      | TLTEHPIIH                     | SVIRGNPDC                | BAE98090.1    | ASPGHLECF      | TLTEHPIIH                     | STIRHGNPL                |
| BAC652550.1   | ASPIRLECR      | TLTEHPIIH                     | SVIRGTVDS                | ABK80468.1    | DAEGRRLTCK     | TLTEHPIIH                     | SVVHSTIS                 |
| BAC652553.1   | CAEGRDCE       | TLTEHPIIH                     | SVIRGNPDR                | BAF65205.1    | ASPIHLECF      | TLTEHPIIH                     | SVIRHSSPL                |
| AAO673358.1   | DADGRLTCK      | TLTEHPIIH                     | SVIRGNPDA                | BAF65208.1    | ASPGHLECF      | TLTEHPIIH                     | STIRHSTPL                |
| AAO729391.1   | DVDGRLTCK      | TLTEHPIIH                     | SVIRGTVDS                | ABU98319.1    | DADGRLTCK      | TLTEHPIIH                     | SVIRHSTIL                |
| BAC756330.1   | DADGRLTCK      | TLTEHPIIH                     | SVIRGTVDS                | BAF92625.1    | AGPIHLECF      | TLTEHPIIH                     | SVIRHGNPL                |
| BAC77167.1    | ASPIRLECR      | TLTEHPIIH                     | SVIRGTVDS                | ABY66135.1    | DAEGRRLTCK     | TLTEHPIIH                     | SVVHSTIS                 |
| BAC79251.1    | ASPIRLECR      | TLTEHPIIH                     | SVIRGNPDC                | BAG09237.1    | CVDGRLDCE      | TLTEHPIIH                     | SVIRHGNPL                |
| AAT409994.1   | ASPIRLECR      | TLTEHPIIH                     | SVIRGNPDC                | ACA83737.1    | ASPGHLECF      | TLTEHPIIH                     | STIRHGNPL                |
| AAT409997.1   | DTDGRRLTCK     | TLTEHPIIH                     | SVIRGNPDC                | ACB15468.1    | ASPGHLECF      | TLTEHPIIH                     | STIRHGNPL                |
| AAT410000.1   | DTDGRRLTCK     | TLTEHPIIH                     | SVIRGTINN                | BAG32124.1    | ASPGHLECF      | TLTEHPIIH                     | STIRHGNPL                |
| BAD34958.1    | DTDGRRLTCK     | TLTEHPIIH                     | SVIRGTINN                | BAG32127.1    | DADGRLTCK      | TLTEHPIIH                     | SVVHSTVI                 |
| BAD34961.1    | AGPIRLECR      | TLTEHPIIH                     | SVIRGTINN                | BAG32130.1    | AGPIHLECF      | TLTEHPIIH                     | SVIRHGNPL                |
| BAD34964.1    | AGPIRLECR      | TLTEHPIIH                     | SVIRGNPDC                | BAG32133.1    | DADGRLTCK      | TLTEHPIIH                     | SVIRHSTIL                |
| BAD74166.1    | AGPIRLECF      | TLTEHPIIH                     | SVIRGNPDC                | BAG32136.1    | AGPIHLECF      | TLTEHPIIH                     | SVIRHGNPL                |
| BAD74169.1    | AGPIRLECF      | TLTEHPIIH                     | SVIRGNPDC                | ACD62590.1    | ASPGHLECF      | TLTEHPIIH                     | STIRHGNPL                |
| BAD74172.1    | AGPIRLECF      | TLTEHPIIH                     | SVIRGNPDC                | BAG67067.1    | AGPIHLECF      | TLTEHPIIH                     | SVIRHGNPL                |
| BAD74175.1    | AGPIRLECF      | TLTEHPIIH                     | SVIRGNPDC                | BAG67064.1    | AGPIHLECF      | TLTEHPIIH                     | SVIRHGNPL                |
| BAD74178.1    | DADGRLTCK      | TLTEHPIIH                     | SVIRGNPDC                | BAG67061.1    | AGPIHLECF      | TLTEHPIIH                     | SVIRHGNPL                |
| BAD74181.1    | DADGRLTCK      | TLTEHPIIH                     | SVIRGTIDS                | BAG67058.1    | AGPIHLECF      | TLTEHPIIH                     | SVIRHGNPL                |
| BAD74184.1    | DADGRLTCK      | TLTEHPIIH                     | SVIRGTIDS                | BAG67055.1    | AGPIHLECF      | TLTEHPIIH                     | SVIRHGNPL                |
| AAW58001.1    | DADGRLTCK      | TLTEHPIIH                     | SVIRGTIDS                | BAG67073.1    | AGPIHLECF      | TLTEHPIIH                     | SVIRHGNPL                |
|               |                |                               | SAIRHSTVDS               | BAG67070.1    | AGPIHLECF      | TLTEHPIIH                     | SVIRHGNPL                |

| Accession no. | Factor Xa site | Thrombin 1 <sup>st</sup> site | Thrombin 2 <sup>nd</sup> |
|---------------|----------------|-------------------------------|--------------------------|
| ACJ70098.1    | CVDGRIDCF      | TLTHRRPIIH                    | SVIERRGNPD               |
| BAH03559.1    | AGPIRLECF      | TLTHRRPIIH                    | SVIERRGNPD               |
| BAH03562.1    | AGPIRLECF      | TLTHRRPIIH                    | SVIERRGNPD               |
| BAH03565.1    | AGPIRLECF      | TLTHRRPIIH                    | SVIERRGNPD               |
| BAH03568.1    | AGPIRLECF      | TLTHRRPIIH                    | SVIERRGNPD               |
| BAH03571.1    | AGPIRLECF      | TLTHRRPIIH                    | SVIERRGNPD               |
| BAH08575.1    | AGPIRLECF      | TLTHRRPIIH                    | SVIERRGNPD               |
| BAH08578.1    | AGPIRLECF      | TLTHRRPIIH                    | SVIERRGNPD               |
| BAH08581.1    | AGPIRLECF      | TLTHRRPIIH                    | SVIERRGNPD               |
| BAH08584.1    | AGPIRLECF      | TLTHRRPIIH                    | SVIERRGNPD               |
| BAH08587.1    | AGPIRLECF      | TLTHRRPIIH                    | SVIERRGNPD               |
| BAH08590.1    | AGPIRLECF      | TLTHRRPIIH                    | SVIERRGNPD               |
| BAH08593.1    | AGPIRLECF      | TLTHRRPIIH                    | SVIERRGNPD               |
| BAH08596.1    | ASPGRLECF      | TLTHRRPIIH                    | SVIERRGNPD               |
| BAH08599.1    | DTDGRFLTCK     | TLTHRRPIIH                    | SVIERRGNPD               |
| BAH08602.1    | AGPIRLECF      | TLTHRRPIIH                    | SVIERRGNPD               |
| BAH08605.1    | ASPGRLECF      | TLTHRRPIIH                    | SVIERRGNPD               |
| BAH08608.1    | AGPIRLECF      | TLTHRRPIIH                    | SVIERRGNPD               |
| BAH08611.1    | AGPIRLECF      | TLTHRRPIIH                    | SVIERRGNPD               |
| BAH08614.1    | DADGRFLTCK     | TLTHRRPIIH                    | SVIERRGNPD               |
| BAH08617.1    | DTDGRFLTCK     | TLTHRRPIIH                    | SVIERRGNPD               |
| BAH08620.1    | DTDGRFLTCK     | TLTHRRPIIH                    | SVIERRGNPD               |
| BAH08623.1    | DTDGRFLTCK     | TLTHRRPIIH                    | SVIERRGNPD               |
| BAH08626.1    | DTDGRFLTCK     | TLTHRRPIIH                    | SVIERRGNPD               |
| ACL54976.1    | AGPIRLECF      | TLTHRRPIIH                    | SVIERRGNPD               |
| BAH10868.1    | AGPIRLECF      | TLTHRRPIIH                    | SVIERRGNPD               |
| ACN76575.1    | DADGRFLTCK     | TLTHRRPIIH                    | SVIERRGNPD               |
| BAH59608.1    | AGPIRLECF      | TLTHRRPIIH                    | SVIERRGNPD               |
| BAH59611.1    | AGPIRLECF      | TLTHRRPIIH                    | SVIERRGNPD               |
| ACR56297.1    | AGPIRLECF      | TLTHRRPIIH                    | SVIERRGNPD               |
| BAH69078.1    | DTDGRFLTCK     | TLTHRRPIIH                    | SVIERRGNPD               |
| ACT52380.1    | VGPGRLECF      | TLTHRRPIIH                    | SVIERRGNPD               |
| ACT52383.1    | TGPGRLECF      | TLTHRRPIIH                    | SVIERRGNPD               |
| ACU12604.1    | ASPGRLECF      | TLTHRRPIIH                    | SVIERRGNPD               |
| ADA61126.1    | DADGRFLTCK     | TLTHRRPIIH                    | SVIERRGNPD               |
| ADG36436.1    | AGPIRLECF      | TLTHRRPIIH                    | SVIERRGNPD               |
| BAJ09463.1    | DADGRFLTCK     | TLTHRRPIIH                    | SVIERRGNPD               |
| BAJ09466.1    | DADGRFLTCK     | TLTHRRPIIH                    | SVIERRGNPD               |
| ADK88897.1    | DADGRFLTCK     | TLTHRRPIIH                    | SVIERRGNPD               |
| ADO17767.1    | DADGRFLTCK     | TLTHRRPIIH                    | SVIERRGNPD               |
| ADV71352.1    | AGPIRLECF      | TLTHRRPIIH                    | SVIERRGNPD               |
| BAJ61825.1    | DTAGRFLACF     | TLTHRRPIIH                    | SVIERRGNPD               |
| ADV92628.1    | AGPIRLECF      | TLTHRRPIIH                    | SVIERRGNPD               |
| ADV92631.1    | AGPIRLECF      | TLTHRRPIIH                    | SVIERRGNPD               |
| BAJ22676.2    | DTDGRFLTCK     | TLTHRRPIIH                    | SVIERRGNPD               |

| Accession no. | Factor Xa site | Thrombin 1 <sup>st</sup> site | Thrombin 2 <sup>nd</sup> |
|---------------|----------------|-------------------------------|--------------------------|
| ADZ57215.1    | DAEGRILTCK     | LTHRRPIIHA                    | PSVIERRGNPD              |
| BAK08878.1    | AGPIRLECF      | LTHRRPIIHA                    | PSVIERRGNPD              |
| BAK08881.1    | ASPIRLECF      | LTHRRPIIHA                    | PSVIERRGNPD              |
| AEA48881.1    | ASPGRLECF      | LTHRRPIIHA                    | PSVIERRGNPD              |
| BAK19084.1    | DADGRILTCK     | LTHRRPIIHA                    | PSVIERRGNPD              |
| BAK19087.1    | DADGRILTCK     | LTHRRPIIHA                    | PSVIERRGNPD              |
| BAK52233.1    | ASPIRLECF      | LTHRRPIIHA                    | PSVIERRGNPD              |
| BAK52236.1    | AGPIRLECF      | LTHRRPIIHA                    | PSVIERRGNPD              |
| AEO16235.1    | DADGRILTCK     | LTHRRPIIHA                    | PSVIERRGNPD              |
| AEV52326.1    | ASPGRLECF      | LTHRRPIIHA                    | PSVIERRGNPD              |
| AEW87504.1    | ASPIRLECF      | LTHRRPIIHA                    | PSVIERRGNPD              |
| AEX32827.1    | AGPIRLECF      | LTHRRPIIHA                    | PSVIERRGNPD              |
| BAL61209.1    | AGPIRLECF      | LTHRRPIIHA                    | PSVIERRGNPD              |
| AFD33683.1    | AGPIRLECF      | LTHRRPIIHA                    | PSVIERRGNPD              |
| AFD33686.1    | AGPIRLECF      | LTHRRPIIHA                    | PSVIERRGNPD              |
| AFH34996.1    | ASPGRLECF      | LTHRRPIIHA                    | PSVIERRGNPD              |
| AFH34999.1    | ASPGRLECF      | LTHRRPIIHA                    | PSVIERRGNPD              |
| AFH35002.1    | ASPGRLECF      | LTHRRPIIHA                    | PSVIERRGNPD              |
| AFJ93211.1    | DADGRILTCK     | LTHRRPIIHA                    | PSVIERRGNPD              |
| AFJ93214.1    | CVDGRIDCF      | LTHRRPIIHA                    | PSVIERRGNPD              |
| AFJ93217.1    | DADGRILTCK     | LTHRRPIIHA                    | PSVIERRGNPD              |
| AFJ93220.1    | DTDGRILTCK     | LTHRRPIIHA                    | PSVIERRGNPD              |
| AFK65670.1    | DADGRILTCK     | LTHRRPIIHA                    | PSVIERRGNPD              |
| AFK65673.1    | AGPIRLECF      | LTHRRPIIHA                    | PSVIERRGNPD              |
| AFO10118.1    | DADGRILTCK     | LTHRRPIIHA                    | PSVIERRGNPD              |
| AFP73624.1    | AGPIRLECF      | LTHRRPIIHA                    | PSVIERRGNPD              |
| AFP82888.1    | AGPIRLECF      | LTHRRPIIHA                    | PSVIERRGNPD              |
| BAM36431.1    | DADGRILTCK     | LTHRRPIIHA                    | PSVIERRGNPD              |
| AFR53968.1    | ASPIRLECF      | LTHRRPIIHA                    | PSVIERRGNPD              |
| AFR53971.1    | ASPGRLECF      | LTHRRPIIHA                    | PSVIERRGNPD              |
| AFR53974.1    | ASPGRLECF      | LTHRRPIIHA                    | PSVIERRGNPD              |
| AFV92497.1    | AGPIRLECF      | LTHRRPIIHA                    | PSVIERRGNPD              |
| BAM68889.1    | VGPGRLECF      | LTHRRPIIHA                    | PSVIERRGNPD              |
| BAM68892.1    | AGPIRLECF      | LTHRRPIIHA                    | PSVIERRGNPD              |
| BAM68895.1    | AGPIRLECF      | LTHRRPIIHA                    | PSVIERRGNPD              |
| BAM78544.1    | AGPIRLECF      | LTHRRPIIHA                    | PSVIERRGNPD              |
| AGE91705.1    | DADGRILTCK     | LTHRRPIIHA                    | PSVIERRGNPD              |
| BAN57590.1    | CTDGRIDCF      | LTHRRPIIHA                    | PSVIERRGNPD              |
| BAN57593.1    | CTDGRIDCF      | LTHRRPIIHA                    | PSVIERRGNPD              |
| BAN63764.1    | ASPGRLECF      | LTHRRPIIHA                    | PSVIERRGNPD              |
| BAN63767.1    | ASPGRLECF      | LTHRRPIIHA                    | PSVIERRGNPD              |
| BAN63770.1    | ASPGRLECF      | LTHRRPIIHA                    | PSVIERRGNPD              |
| BAN63773.1    | ASPGRLECF      | LTHRRPIIHA                    | PSVIERRGNPD              |
| AGT38396.1    | DAEGRILTCK     | LTHRRPIIHA                    | PSVIERRGNPD              |
| AGT96613.1    | ASPGRLECF      | LTHRRPIIHA                    | PSVIERRGNPD              |

| Accession no. | Factor Xa site | Thrombin 1 <sup>st</sup> site | Thrombin 2 <sup>nd</sup> site | Accession no. | Factor Xa site | Thrombin 1 <sup>st</sup> site | Thrombin 2 <sup>nd</sup> site |
|---------------|----------------|-------------------------------|-------------------------------|---------------|----------------|-------------------------------|-------------------------------|
| AGT96616.1    | ASPGRLLECR     | YTLSERRPIIHS                  | STIIRGNPDC                    | APG39844.1    | TSGRLDCC       | TLTERRPIIHS                   | SVIIRGNPDC                    |
| AGT96619.1    | ASPGRLLECR     | YTLSERRPIIHS                  | STIIRGNPDC                    | BAX25173.1    | GPIRLECR       | TLTERRPIIHS                   | SVIIRGNPDC                    |
| AGT96622.1    | ASPGRLLECR     | YTLSERRPIIHS                  | STIIRGNPDC                    | BAX25176.1    | GPIRLECR       | TLTERRPIIHS                   | SVIIRGNPDC                    |
| AGT96625.1    | ASPGRLLECR     | YTLSERRPIIHS                  | STIIRGNPDC                    | ARJ36906.1    | GPGRLECR       | TLSERRPIIHS                   | SVIIRGNPDC                    |
| AHC54587.1    | AGPIRLECR      | YTLTERRPIIHS                  | SVIIRGYPDC                    | BBA54710.1    | ADGRIDCE       | TLTERRPIIHS                   | SVIIRGNPDC                    |
| AHC54590.1    | AGPIRLECR      | YTLTERRPIIHS                  | SVIIRGYPDC                    | BBA54718.1    | SPIRLECR       | TLTERRPIIHS                   | SVIIRGNPDC                    |
| AHC55358.1    | AGPGRLLECR     | YTLTERRPIIHS                  | STIIRGNPDC                    | BBA80360.1    | ADGRIDCE       | TLTERRPIIHS                   | SVIIRGNPDC                    |
| BAO31621.1    | DTNRLVCR       | YSLTERRPIIHS                  | SVVIRGAVEC                    | BBA80363.1    | ADGRIDCE       | TLTERRPIIHS                   | SVIIRGNPDC                    |
| AHF50467.1    | DAEGRLETCR     | YTLTERRPIIHS                  | SVVIRSTIS                     | BBA80366.1    | ADGRIDCE       | TLTERRPIIHS                   | SVIIRGNPDC                    |
| AHL67385.1    | AGPGRLLECR     | YTLLERRPIIHS                  | SVIIRGNPDC                    | BBA80369.1    | ADGRIDCE       | TLTERRPIIHS                   | SVIIRGNPDC                    |
| AHL67388.1    | AGPGRLLECR     | YTLLERRPIIHS                  | SVIIRGNPDC                    | ATN40272.1    | SPGRLECR       | TLSERRPIIHS                   | STIIRGDPDC                    |
| AHY61295.1    | SYPGRIEICK     | YTLTERRPIIHS                  | SVIIRGTPDC                    | ATN40275.1    | SPGRLECR       | TLSERRPIIHS                   | STIIRGDPDC                    |
| AHY61298.1    | SHPGRIEICK     | YTLTERRPIIHS                  | SVIIRGSPDC                    | sp P29324.1   | VDCRIDCE       | TLTERRPIIHS                   | SVIIRGNPDC                    |
| AID70919.1    | AGPIRLECR      | YTLTERRPIIHS                  | SVIIRGSPDC                    | sp O03495.1   | TSGRLDCC       | TLTERRPIIHS                   | SVIIRGNPDC                    |
| AI120308.1    | AGPIRLECR      | YTLSERRPIIHS                  | SVIIRGNPDC                    | sp O04610.1   | VDCRIDCE       | TLTERRPIIHS                   | SVIIRGNPDC                    |
| AIJ27593.1    | ASPGRLLECR     | YTLSERRPIIHS                  | STIIRGNPDC                    | sp P33424.2   | VDCRIDCE       | TLTERRPIIHS                   | SVIIRGNPDC                    |
| AIP98381.1    | ---EPEVY       | YTVTERRPIIHS                  | AALEKARTI                     | sp O9IVZ9.1   | ADGRLETCR      | TLTERRPIIHS                   | SVIIRGTDI                     |
| BAP86929.1    | DADGRLETCR     | YTLSERRPIIHS                  | SVIIRGTIDC                    | sp O9WC28.1   | VDCRIDCE       | TLTERRPIIHS                   | SVIIRGNPDC                    |
| BAP86932.1    | DADGRLETCR     | YTLSERRPIIHS                  | SVIIRGTIDC                    | sp O81862.1   | VDCRIDCE       | TLTERRPIIHS                   | SVIIRGNPDC                    |
| BAC95549.1    | ASPGRLLECR     | YTLSERRPIIHS                  | SVIIRGNPDC                    | ADM35748.1    | ---EPEVY       | TVTERRPIIHS                   | AAVEKARTI                     |
| AHC70111.2    | AGMIFAAER      | YTLSERRPIIHS                  | AEAIRIPDI                     | ADM35754.1    | ---EPEVY       | TVTERRPIIHS                   | AAVEKARTI                     |
| AKO44212.1    | AGPIRLECR      | YTLTERRPIIHS                  | SVIIRGSPDC                    | sp O6J8G2.1   | SPGRLECR       | TLTERRPIIHS                   | SVIIRGNPDC                    |
| BAS29763.1    | DTDGRLETCR     | YTLTERRPIIHS                  | SVIIRGTPDC                    | BAS66972.1    | TDCRIDCE       | TLTERRPIIHS                   | SVIIRGNPDC                    |
| ALH42675.1    | ASPGRLLECR     | YTLTERRPIIHS                  | STIIRGNPDC                    | BAL04585.1    | GPIRLECR       | TLTERRPIIHS                   | SVIIRGNPDC                    |
| ALM55661.1    | AGPIRLECR      | YTLTERRPIIHS                  | SVIIRGNLDC                    | BAT32882.1    | SPGRLECR       | TLSERRPIIHS                   | STIIRGNPDC                    |
| ALN69915.1    | SHPGRIEICK     | YTLAERRPIIHS                  | SVIIRGTPDC                    | BAT32885.1    | SPGRLECR       | TLSERRPIIHS                   | STIIRGNPDC                    |
| BAT70058.1    | ---LADVY       | YTECHRRPIIHS                  | AAVEKARTI                     | AOG18209.1    | SPGRLECR       | TLSERRPIIHS                   | STIIRGNPDC                    |
| BAT70062.1    | ---LADVY       | YTECHRRPIIHS                  | AAVEKARTI                     | AOG18211.1    | SPGRLECR       | TLSERRPIIHS                   | STIIRGNPDC                    |
| ALY05712.1    | AGPIRLECR      | YTLTERRPIIHS                  | SVIIRGNPDC                    | AOG18214.1    | SPGRLECR       | TLSERRPIIHS                   | STIIRGNPDC                    |
| ALY05715.1    | AGPIRLECR      | YTLXERRPIIHS                  | SVIIRGNPDC                    | AOG18217.1    | SPGRLECR       | TLSERRPIIHS                   | STIIRGNPDC                    |
| ALY05718.1    | AGPIRLECR      | YTLTERRPIIHS                  | SVIIRGNPDC                    | AOG18220.1    | SPGRLECR       | TLSERRPIIHS                   | STIIRGNPDC                    |
| ALY05721.1    | AGPIRLECR      | YTLTERRPIIHS                  | SVIIRGNPDC                    | AOG18223.1    | SPGRLECR       | TLSERRPIIHS                   | STIIRGNPDC                    |
| AMA22617.1    | AGPIRLECR      | YTLVERRPIIHS                  | SVIIRGNPDC                    | AOG18226.1    | SPGRLECR       | TLSERRPIIHS                   | STIIRGNPDC                    |
| AMD16213.1    | ANPIRLECR      | YTLTERRPIIHS                  | SVIIRGNPDC                    | BAS32609.1    | AEGRLVCK       | TPTERRPIIHS                   | SVIIRGNPDC                    |
| AMD16216.1    | ASPGRLLECR     | YTLSERRPIIHS                  | STIIRGNPDC                    | sp O9YLR1.1   | SPGRLECR       | TLSERRPIIHS                   | SVIIRGNPDC                    |
| AMD16219.1    | ANPIRLECR      | YTLTERRPIIHS                  | SVIIRGNPDC                    | AFP19142.1    | YDSKTRRY       | CRGAVNVII                     | VCPVAP---                     |
| BAU50952.1    | DADGRLETCR     | YTLTERRPIIHS                  | SVVIRGTIG                     | YP00657650    | YDSKTRRY       | CRGAVNVII                     | VCPVAP---                     |
| ANQ45732.1    | AGPIRLECR      | YTLTERRPIIHS                  | SVIIRGNPDC                    | AAC97208.1    | SPGRLECR       | TLTERRPIIHS                   | SVIIRGNPDC                    |
| ANW09725.1    | AGPGRLLECR     | YTLTERRPIIHS                  | SVIIRGNPDC                    | BAB793004.1   | SPGRLECR       | TLTERRPIIHS                   | SVIIRGNPDC                    |
| BAV53288.1    | AGPIRLECR      | YTLTERRPIIHS                  | SVIIRGNPDC                    | AAM92182.1    | SPGRLECR       | TLTERRPIIHS                   | SVIIRGNPDC                    |
| BAV53291.1    | AGPIRLECR      | YTLTERRPIIHS                  | SVIIRGNPDC                    | BAC75627.1    | ADGRLETCR      | TLTERRPIIHS                   | SVIIRGNPDC                    |
| BAV53291.1    | AGPIRLECR      | YTLTERRPIIHS                  | SVIIRGNPDC                    | AAT02424.1    | ADGRLETCR      | TLTERRPIIHS                   | SVIIRGNPDC                    |
| BAV57605.1    | AGPIRLECR      | YTLTERRPIIHS                  | SVIIRGNPDC                    | ABB88699.2    | ADGRLETCR      | TLTERRPIIHS                   | SVIIRGNPDC                    |
| AOR52320.1    | VDSNRLEDCR     | YTLAERRPIIHS                  | SVIIRGTPDC                    | ACH879553.1   | SPGRLECR       | TLSERRPIIHS                   | STIIRGNPDC                    |
| AOR52323.1    | VDSNRLEDCR     | YTLAERRPIIHS                  | SVIIRGTPDC                    | ACH879556.1   | SPGRLECR       | TLSERRPIIHS                   | STIIRGNPDC                    |
| AOR52326.1    | VDSNRLEDCR     | YTLAERRPIIHS                  | SVIIRGTPDC                    | ACH879559.1   | SPGRLECR       | TLSERRPIIHS                   | STIIRGNPDC                    |

| Accession no. | Factor Xa site | Thrombin 1 <sup>st</sup> site | Thrombin 2 <sup>nd</sup> site |
|---------------|----------------|-------------------------------|-------------------------------|
| BAH22710.1    | ASPGRLLECR     | TLTERRPIIHS                   | STIIRGNPDC                    |
| BAH22713.1    | DADGRLETCR     | TLTERRPIIHS                   | SVIIRSTVD                     |
| BAH22716.1    | ASPIRLECR      | TLTERRPIIHS                   | SVIIRGNPDC                    |
| BAH22719.1    | ASPIRLECR      | TLTERRPIIHS                   | SVIIRGNPDC                    |
| ACV66469.1    | AGPIRLECR      | TLTERRPIIHS                   | SVIIRGNPDC                    |
| ACV66480.1    | ASPGRLLECR     | TLTERRPIIHS                   | STIIRGNLDC                    |
| ACZ67487.1    | DADGRLETCR     | TLTERRPIIHS                   | SVIIRSTVD                     |
| ADC32804.1    | DADGRLETCR     | TLTERRPIIHS                   | SVIIRSTVD                     |
| AFY63501.1    | DADGRLETCR     | TLTERRPIIHS                   | SVIIRSTVD                     |
| AGV22365.1    | DADGRLETCR     | TLTERRPIIHS                   | SVIIRSTVD                     |
| AHZ44444.1    | ASPIRLECR      | TLTERRPIIHS                   | SVIIRGNPDC                    |
| AHZ44447.1    | ASPIRLECR      | TLTERRPIIHS                   | SVIIRGNPDC                    |
| AKE33870.1    | DADGRLETCR     | TLTERRPIIHS                   | SVIIRSTVD                     |
| AMH40418.1    | ASPIRLECR      | TLTERRPIIHS                   | SVIIRGNPDC                    |
| ART85723.1    | ASPIRLECR      | TLTERRPIIHS                   | SVIIRGNPDC                    |
